# Supplementary material
Source: Springer Nature journal article supplement (https://www.springermedizin.de/resource/supplementary/12893_2013_444_MOESM2_ESM.pdf/9512154)

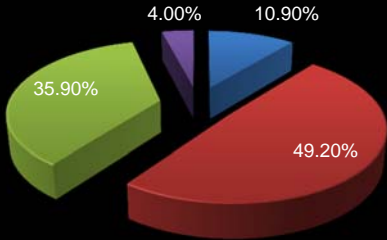

- No Chemotherapy-39(10.9%)
- Neoadjuvant-174(49.2%)
- Adjuvant-127(35.9%)
- Both-14(4%)

Supplement: MOESM2 [file 9512154]
